# Supplementary material for: The Neural Substrate and Functional Integration of Uncertainty in Decision Making: An Information Theory Approach
Source: PubMed Central journal article supplement (PMC3052308; doi:10.1371/journal.pone.0017408), 2011-03-09

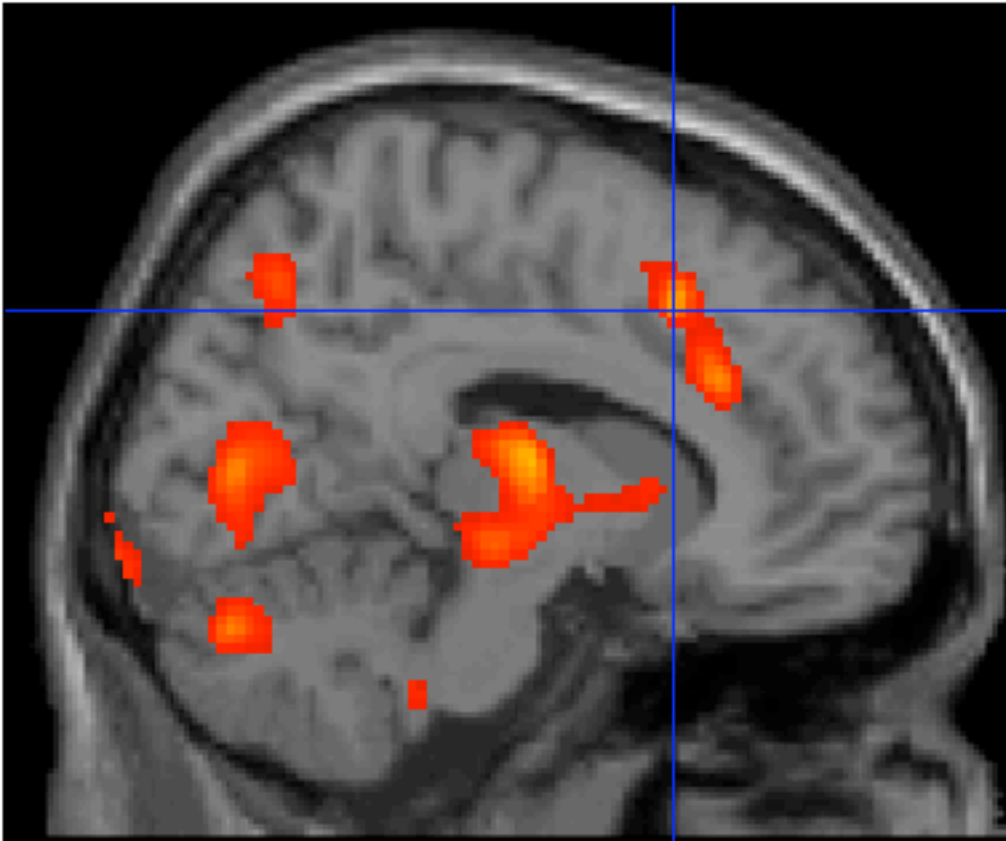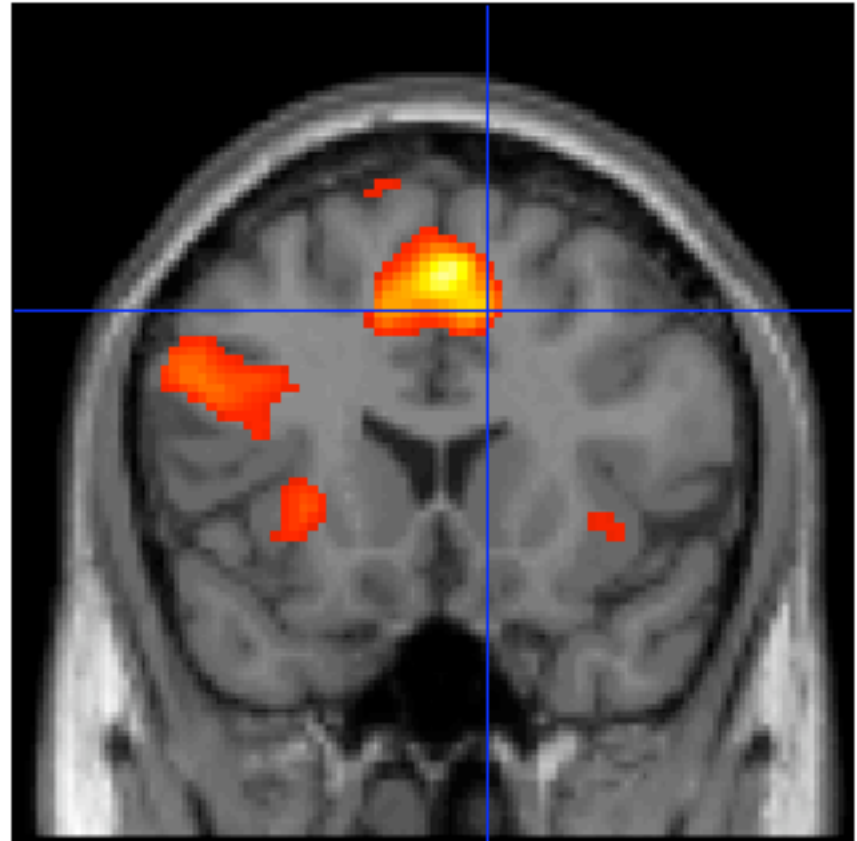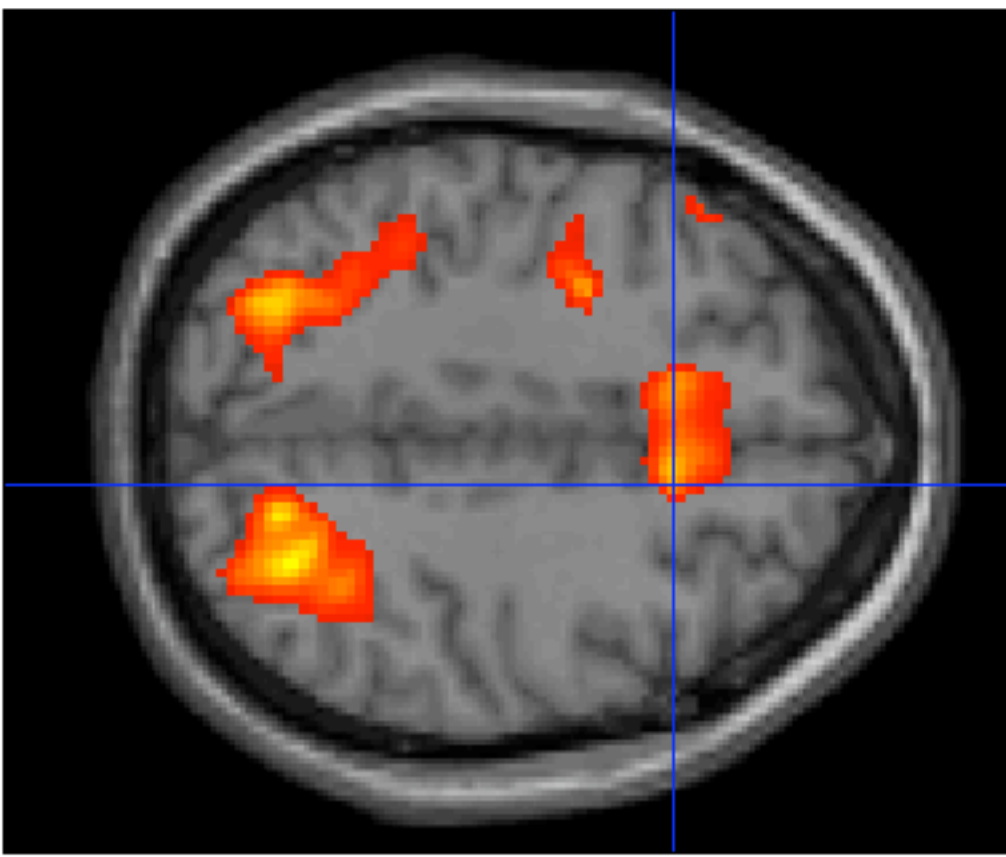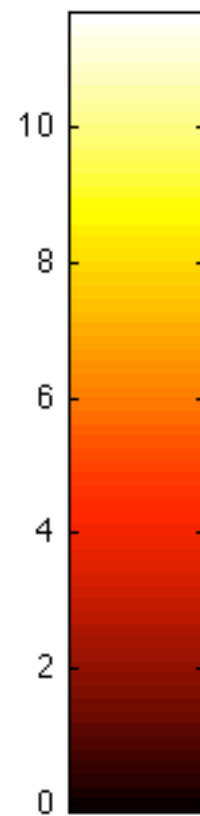

Supplement: pone.0017408.s002.pdf [file pone.0017408.s002.pdf]
