# Supplementary material for: The Neural Substrate and Functional Integration of Uncertainty in Decision Making: An Information Theory Approach
Source: PubMed Central journal article supplement (PMC3052308; doi:10.1371/journal.pone.0017408), 2011-03-09
Supplement: pone.0017408.s004.pdf [file pone.0017408.s004.pdf]

A

XXX

XX

XXX

B

XXX

XX

XXX

A

30 €

1 m

20 %

B

30 €

3 m

50 %
