# Supplementary material for: The Neural Substrate and Functional Integration of Uncertainty in Decision Making: An Information Theory Approach
Source: PubMed Central journal article supplement (PMC3052308; doi:10.1371/journal.pone.0017408), 2011-03-09
Supplement: pone.0017408.s005.pdf [file pone.0017408.s005.pdf]

**Table S1.  $H_{\text{inter}}$ : Shannon entropy (bits) for each task configuration  $\mathcal{T}^{\rho,t}$  Values are based on the inter-subject variability of the decisions.**

| time $t$ | reward probability $\rho$ |        |        |        |        |        |
|----------|---------------------------|--------|--------|--------|--------|--------|
|          | 0.30                      | 0.40   | 0.50   | 0.60   | 0.70   | 0.80   |
| 2        | 0.9968                    | 0      | 0      | 0      | 0      | 0      |
| 3        | 0.9710                    | 0.9710 | 0.3534 | 0      | 0      | 0      |
| 4        | 0.8366                    | 0.9968 | 0.9183 | 0.5665 | 0.3534 | 0      |
| 5        | 0.5665                    | 0.9968 | 0.9710 | 0.8366 | 0.7219 | 0.5665 |
| 6        | 0.5665                    | 0.9183 | 0.9710 | 0.9710 | 0.8366 | 0.7219 |
| 7        | 0.3534                    | 0.9183 | 0.9968 | 0.9183 | 0.9183 | 0.7219 |

Entropy for {27 euros,100%,1 month} and {33 euros,100%,2 months} is 0.7219 bits.

Entropy for {33 euros,20%,*now*} and {27 euros,30%,*now*} is 0.9183 bits.
