# Supplementary material for: The Neural Substrate and Functional Integration of Uncertainty in Decision Making: An Information Theory Approach
Source: PubMed Central journal article supplement (PMC3052308; doi:10.1371/journal.pone.0017408), 2011-03-09
Supplement: pone.0017408.s006.pdf [file pone.0017408.s006.pdf]

**Table S2.  $H_{\text{pooled}}$ : Shannon entropy (bits) for each task configuration  $\mathcal{T}^{\rho,t}$ .** Values are based on the pooled variability (inter- and within-subject) of the decisions.

| time $t$ | reward probability $\rho$ |                     |        |        |        |        |
|----------|---------------------------|---------------------|--------|--------|--------|--------|
|          | 0.30                      | 0.40                | 0.50   | 0.60   | 0.70   | 0.80   |
| 2        | 0.9953                    | 0.4022              | 0.1774 | 0.1033 | 0.1774 | 0.1022 |
| 3        | 0.9427                    | 0.9626              | 0.5294 | 0.2423 | 0.1022 | 0.1022 |
| 4        | 0.8893 <sup>A</sup>       | 0.9968              | 0.8730 | 0.6944 | 0.4475 | 0.1022 |
| 5        | 0.7478 <sup>A</sup>       | 0.9999              | 0.9532 | 0.9183 | 0.6944 | 0.6343 |
| 6        | 0.7722 <sup>A</sup>       | 0.9896 <sup>A</sup> | 0.9809 | 0.9782 | 0.8366 | 0.6705 |
| 7        | 0.5294 <sup>A</sup>       | 0.9710 <sup>A</sup> | 0.9937 | 0.9311 | 0.9183 | 0.8218 |

Entropy for {27 euros,100%,1 month} and {33 euros,100%,2 months} is 0.8780 bits.

Entropy for {33 euros,20%,*now*} and {27 euros,30%,*now*} is 0.9626 bits.

Exponent  $A$  denotes that option  $A$  was preferred to option  $B$  (no exponent otherwise).
