# Supplementary material for: The Neural Substrate and Functional Integration of Uncertainty in Decision Making: An Information Theory Approach
Source: PubMed Central journal article supplement (PMC3052308; doi:10.1371/journal.pone.0017408), 2011-03-09
Supplement: pone.0017408.s007.pdf [file pone.0017408.s007.pdf]

**Table S3. Clusters showing functional connectivity gain with MCC(right) as the entropy increases (PPI analysis).**

| Cluster | voxels | Anatomical area (side)     | Lobe     | MNI coordinates |     |     | t-value |
|---------|--------|----------------------------|----------|-----------------|-----|-----|---------|
|         |        |                            |          | x               | y   | z   |         |
| 1       | 147    | Middle Temporal Gyrus (R)  | Temporal | 62              | -6  | -24 | 5.91    |
| 2       | 120    | Middle Frontal Gyrus (L)   | Frontal  | -24             | 24  | 46  | 5.35    |
|         |        | Superior Frontal Gyrus (L) | Frontal  | -16             | 30  | 40  | 4.68    |
| 3       | 44     | Middle Temporal Gyrus (L)  | Temporal | -64             | -26 | -4  | 5.27    |
| 4       | 27     | Superior Medial Gyrus (L)  | Frontal  | -4              | 64  | 12  | 4.37    |
|         |        | Superior Frontal Gyrus (L) | Frontal  | -12             | 66  | 14  | 4.20    |
| 5       | 25     | Superior Medial Gyrus (R)  | Frontal  | 10              | 62  | 2   | 5.20    |
| 6       | 17     | Middle Orbital Gyrus (L)   | Frontal  | -8              | 54  | -2  | 5.06    |

Height threshold  $t\text{-value}=3.85$ ,  $p < 0.001$  uncorrected. Extent threshold:  $k = 10$  voxels.  
MNI coordinates of seed at MCC(R): [12 18 42].
