# Supplementary material for: The Neural Substrate and Functional Integration of Uncertainty in Decision Making: An Information Theory Approach
Source: PubMed Central journal article supplement (PMC3052308; doi:10.1371/journal.pone.0017408), 2011-03-09
Supplement: pone.0017408.s008.pdf [file pone.0017408.s008.pdf]

**Table S4. Clusters showing functional connectivity with pre-SMA(bilateral) as the entropy increases.**

| Cluster | voxels | Anatomical area (side)        | Lobe          | MNI coordinates |     |     | t-value |
|---------|--------|-------------------------------|---------------|-----------------|-----|-----|---------|
|         |        |                               |               | x               | y   | z   |         |
| 1       | 902    | Precuneus (R)                 | Parietal      | 12              | -46 | 62  | 4.51    |
|         |        | Superior Parietal Lobule (R)  | Parietal      | 26              | -50 | 68  | 4.25    |
|         |        | Postcentral Gyrus (R)         | Parietal      | 26              | -30 | 60  | 4.06    |
|         |        | Middle Cingulate Cortex (L)   | Frontal       | -2              | -28 | 46  | 3.81    |
|         |        | Paracentral Lobule (R)        | Frontal       | 14              | -32 | 50  | 3.64    |
|         |        | Middle Cingulate Cortex (R)   | Frontal       | 14              | -30 | 46  | 3.53    |
| 2       | 130    | Posterior Insula (R)          | Insular       | 40              | -6  | -8  | 4.34    |
| 3       | 120    | Superior Parietal Lobule (L)  | Parietal      | -26             | -46 | 66  | 3.84    |
|         |        | Postcentral Gyrus (L)         | Parietal      | -28             | -38 | 50  | 3.77    |
| 4       | 96     | Temporal Pole (R)             | Temporal      | 62              | 4   | -2  | 4.18    |
| 5       | 62     | Middle Frontal Gyrus (L)      | Frontal       | -20             | 22  | 44  | 3.62    |
| 6       | 60     | Cerebellum VIII (L)           | Cerebellum    | -20             | -46 | -56 | 5.03    |
| 7       | 55     | Middle Cingulate Cortex (R)   | Frontal       | 8               | -8  | 46  | 3.72    |
| 8       | 42     | Anterior Cingulate Cortex (L) | Frontal       | -4              | 50  | 0   | 3.83    |
| 9       | 38     | Superior Medial Gyrus (R)     | Frontal       | 10              | 60  | 4   | 4.12    |
| 10      | 34     | Precentral Gyrus (R)          | Frontal       | 46              | -14 | 62  | 4.11    |
| 11      | 32     | Middle Temporal Gyrus (L)     | Temporal      | -54             | -68 | 18  | 4.16    |
| 12      | 24     | Caudate Nucleus (L)           | Basal Ganglia | -6              | 14  | -4  | 4.31    |
| 13      | 23     | Middle Temporal Gyrus (R)     | Temporal      | 60              | -12 | -20 | 3.94    |
| 14      | 21     | Superior Temporal Gyrus (R)   | Temporal      | 58              | -60 | 22  | 3.80    |
| 15      | 20     | Paracentral Lobule (L)        | Frontal       | -16             | -40 | 54  | 3.68    |
| 16      | 17     | Postcentral Gyrus (L)         | Parietal      | -26             | -32 | 72  | 3.82    |
| 17      | 14     | Superior Medial Gyrus (L)     | Frontal       | -2              | 64  | 10  | 3.60    |
| 18      | 13     | Superior Frontal Gyrus (L)    | Frontal       | -18             | 14  | 48  | 3.62    |
| 19      | 11     | Pulvinar (L)                  | Thalamus      | -14             | -34 | 2   | 3.80    |

This analysis is the result of a conjunction of PPIs seeded in pre-SMA(L) and pre-SMA(R).

Height threshold: t-value=3.31,  $p < 0.001$  uncorrected. Extent threshold:  $k = 10$  voxels.

MNI coordinates of seed at pre-SMA(L): [-8 8 52]. MNI coordinates of seed at pre-SMA(R): [6 12 54].
