# Supplementary material for: The Neural Substrate and Functional Integration of Uncertainty in Decision Making: An Information Theory Approach
Source: PubMed Central journal article supplement (PMC3052308; doi:10.1371/journal.pone.0017408), 2011-03-09
Supplement: pone.0017408.s009.pdf [file pone.0017408.s009.pdf]

**Table S5. Individual seeds for PPI analysis at the MCC(right).** This table specifies the MNI coordinates used for each subject at MCC(right) and their individual t-values in the DM>C2 contrast.

| subject | local maxima |    |    | DM>C2   |
|---------|--------------|----|----|---------|
| id      | x            | y  | z  | t-value |
| 1       | 8            | 24 | 44 | 5.16    |
| 2       | 6            | 14 | 50 | 4.45    |
| 3       | 8            | 24 | 42 | 9.88    |
| 4       | 6            | 24 | 44 | 10.80   |
| 5       | 4            | 14 | 48 | 7.45    |
| 6       | 4            | 12 | 50 | 7.48    |
| 7       | 8            | 10 | 50 | 9.89    |
| 8       | -            | -  | -  | -       |
| 9       | 8            | 14 | 48 | 5.95    |
| 10      | 8            | 22 | 42 | 10.93   |
| 11      | 8            | 12 | 50 | 5.82    |
| 12      | 8            | 14 | 50 | 10.38   |
| 13      | 2            | 22 | 42 | 9.80    |
| 14      | 6            | 14 | 44 | 9.48    |
| 15      | 8            | 20 | 38 | 7.93    |

DM>C2 local maxima coordinates and t-values for the contrast of each subject. Subject number 8 did not show DM>C2 activations around these coordinates and therefore was not included in this analysis. Coordinates at the group level are [12 18 42] (t-value=7.72)
