# Supplementary material for: The Neural Substrate and Functional Integration of Uncertainty in Decision Making: An Information Theory Approach
Source: PubMed Central journal article supplement (PMC3052308; doi:10.1371/journal.pone.0017408), 2011-03-09
Supplement: pone.0017408.s010.pdf [file pone.0017408.s010.pdf]

**Table S6. Individual seeds for PPI analysis at the Pre-SMA (left).** This table specifies the MNI coordinates used for each subject at Pre-SMA(left) and their individual t-values in the DM>C2 contrast.

| subject | local maxima |    |    | DM>C2   |
|---------|--------------|----|----|---------|
| id      | x            | y  | z  | t-value |
| 1       | -6           | 14 | 48 | 6.21    |
| 2       | -10          | 10 | 58 | 6.65    |
| 3       | -6           | 20 | 54 | 10.23   |
| 4       | -4           | 12 | 52 | 9.44    |
| 5       | -6           | 8  | 56 | 8.29    |
| 6       | -6           | 14 | 52 | 7.21    |
| 7       | -4           | 6  | 50 | 7.68    |
| 8       | -8           | 12 | 50 | 5.52    |
| 9       | -10          | 10 | 44 | 6.42    |
| 10      | -8           | 8  | 52 | 13.68   |
| 11      | -6           | 10 | 50 | 4.94    |
| 12      | -4           | 10 | 50 | 12.42   |
| 13      | -6           | 8  | 54 | 8.27    |
| 14      | -4           | 12 | 48 | 9.35    |
| 15      | -6           | 8  | 54 | 12.85   |

DM>C2 local maxima coordinates and t-values for contrast of each subject. Coordinates at the group level are [-8 8 52] (t-value=6.07).
